# Supplementary material for: Novel sodium/lithium-ion anode material based on ultrathin Na2Ti2O4(OH)2 nanosheet
Source: Royal Society of Chemistry journal article supplement (doi:10.1039/c5nr03076e), 2015-01-01
Supplement: c5nr03076e1.pdf [file c5nr03076e1.pdf]

## Supporting Informations

### **Novel Sodium/Lithium-ion Anode Material Based on Ultrathin $\text{Na}_2\text{Ti}_2\text{O}_4(\text{OH})_2$ Nanosheet**

*Yuping Zhang,<sup>a</sup> Lin Guo,<sup>a \*</sup> Shihe Yang<sup>a,b</sup>*

*<sup>a \*</sup> School of Chemistry and Environment, Beihang University. Beijing, 100191, P. R.*

*China. E-mail: [guolin@buaa.edu.cn](mailto:guolin@buaa.edu.cn)*

*<sup>b</sup> Department of Chemistry, The Hong Kong University of Science and Technology,*

*Clear Water Bay, Kowloon Hong Kong (P.R. China). E-mail : [chsyang@ust.hk](mailto:chsyang@ust.hk)*

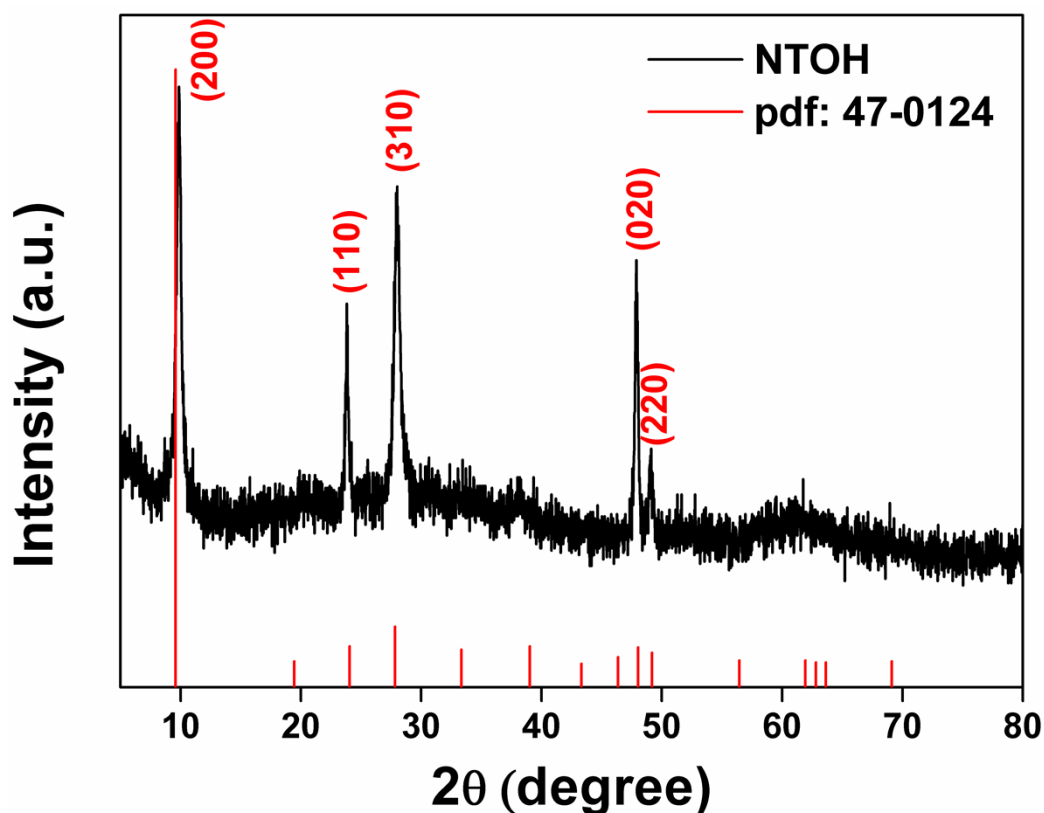

**Figure S1.** XRD pattern of the as prepared ultrathin NTOH nanosheets. All diffraction peaks are similar to the diffraction pattern of body-centered orthorhombic crystal structure of  $\text{H}_2\text{Ti}_2\text{O}_4(\text{OH})_2$  (denoted as HTOH), the most obvious difference lie in that the (200) diffraction peak of NTOH is a bit higher shift than that of HTOH, as the bond distance of Na-O is larger than that of H-O.

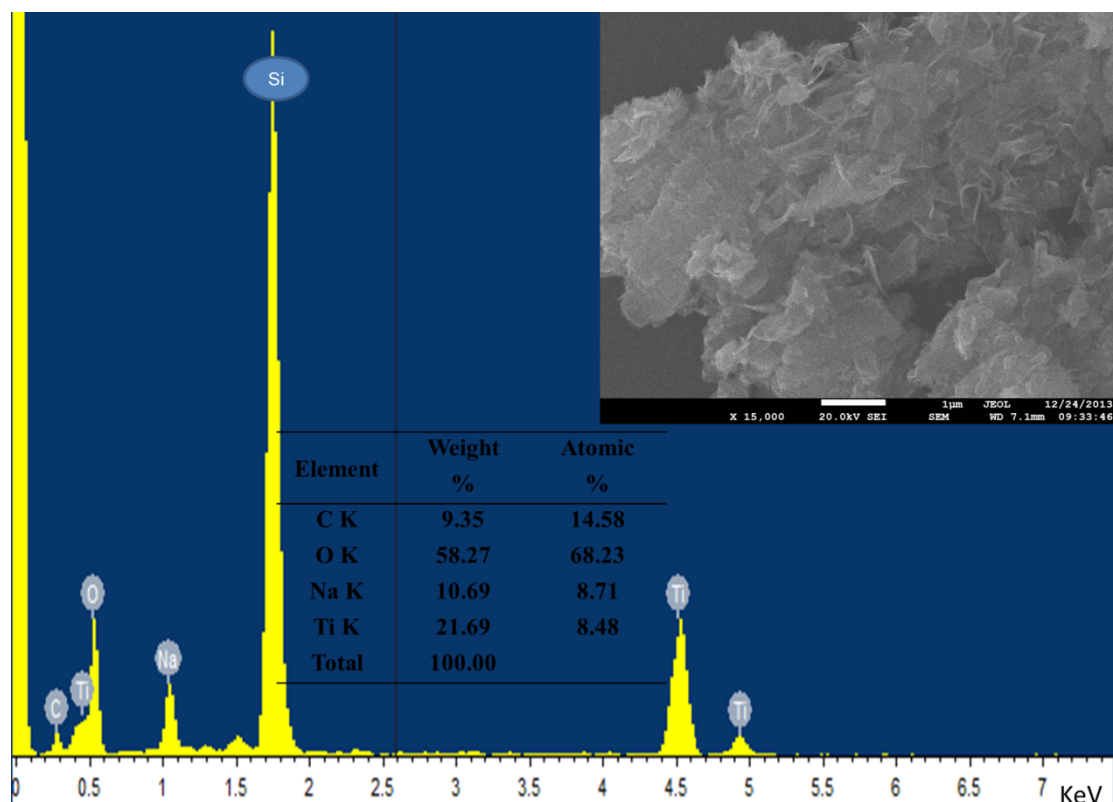

**Figure S2.** EDX spectrum of the ultrathin NTOH nanosheets (inset is an SEM image and inset table of element ratio distribution) As shown in EDX spectrum, the elements of Ti, Na, O are clearly observed, and as shown inset table of ultrathin NTOH nanosheets, Ti/Na atomic ratio is 1.0, which is equal to that of in  $\text{Na}_2\text{Ti}_2\text{O}_4(\text{OH})_2$ . In addition, the C and Si contents mainly derived from the pollution of electrically conductive adhesive and Si substrate.

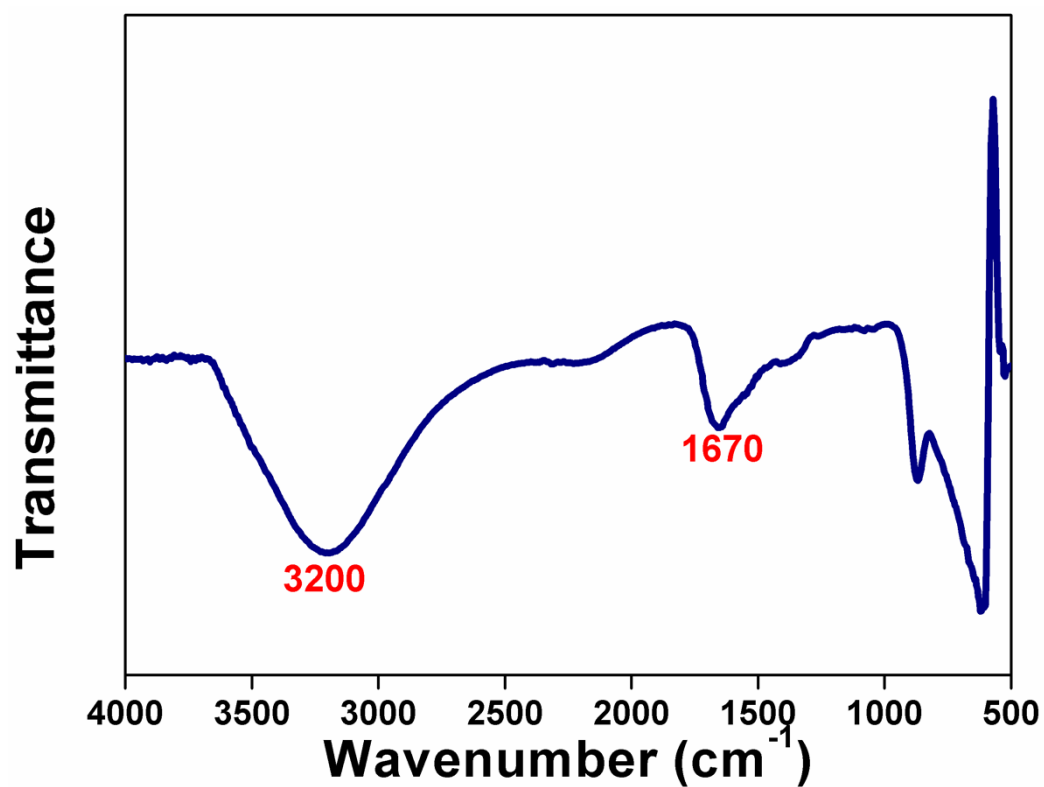

**Figure S 3.** IR spectra of as prepared NTOH nanosheets. A band at 3200 cm<sup>-1</sup> is due to stretching modes of bonded -OH groups and of water molecules coordinated to surface Ti<sup>4+</sup> cations, the bending modes of which also produce a band at 1670 cm<sup>-1</sup> .<sup>[1]</sup>

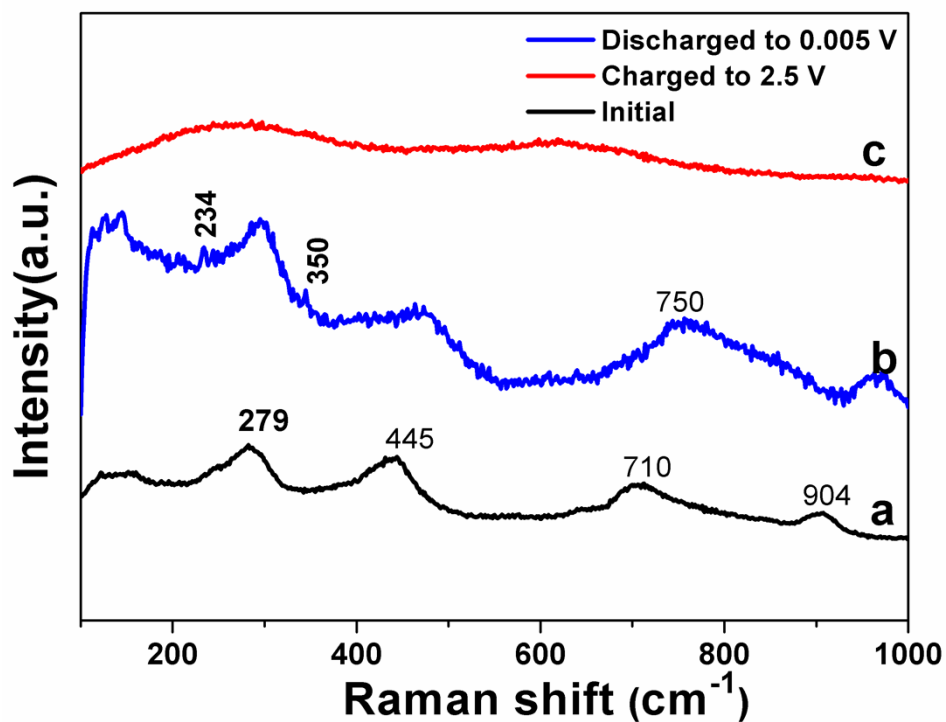

**Figure S4.** Raman spectra of initial NTOH electrode, and the electrode charged to 2.5 V and full discharged to 0.005 V over the coin cell of Lithium ion batteries. The a curve in Figure S4 is the Raman spectra of initial ultrathin  $\text{Na}_2\text{Ti}_2\text{O}_4(\text{OH})_2$  electrode, the bands at 279, 445  $\text{cm}^{-1}$  are ascribed to Na-O-Ti stretching. The band at 710  $\text{cm}^{-1}$  and 750  $\text{cm}^{-1}$  is respectively assigned to Ti-O-Ti and Ti-O stretching in  $\text{TiO}_6$ , while the band at 904  $\text{cm}^{-1}$  is indicated to symmetric stretch of short Ti-O bonds involving nonbridging oxygen coordinated with sodium ions. However, when the  $\text{Li}^+$  inserted into the frame of NTOH, the lattice structure of NTOH was changed. As shown in b curve in Figure 4S, the intensity of Raman bands representing NTOH is weakening, indicating that  $\text{Li}^+$  almost replaced the  $\text{Na}^+$ . The bands at 350  $\text{cm}^{-1}$  can be assigned to stretching vibration of Li-O bond, further proofing that  $\text{Li}^+$  inserted into NTOH frame. In addition, when fully discharged NTOH experienced the process of charging, the Raman bands of fully charged NTOH was almost disappeared, indicating that  $\text{Li}^+$

were extracted during the charge process, left only an Li-free frame as shown in the c curve in Figure 4S. [2-4]

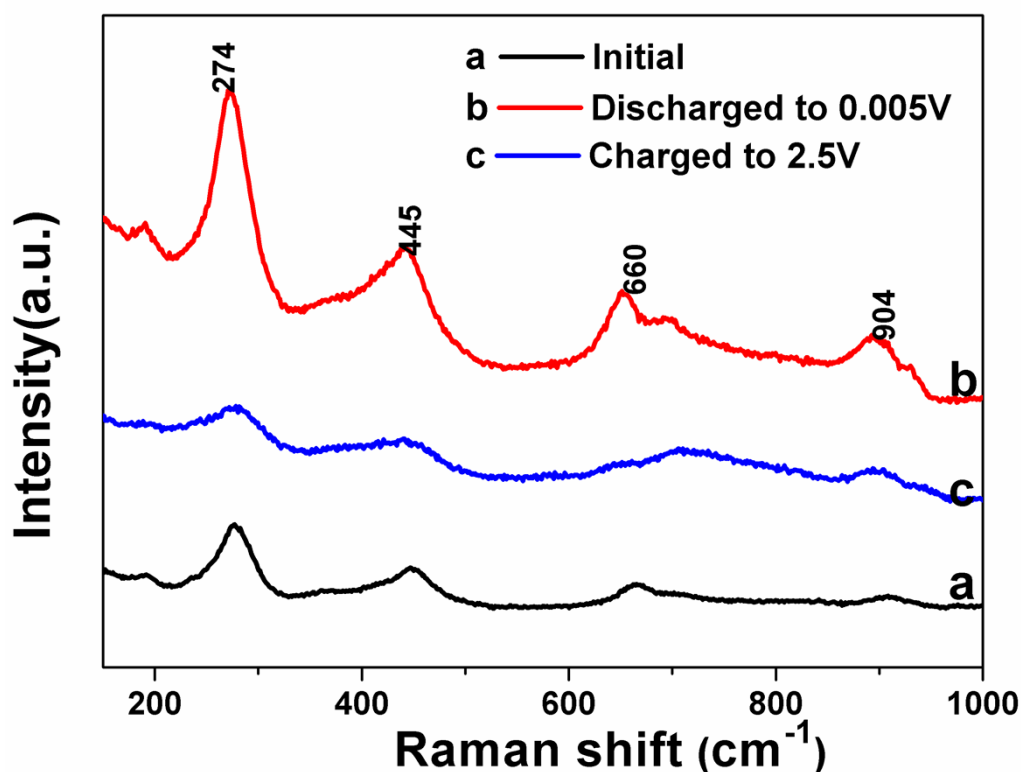

**Figure S5.** Raman spectra of initial NTOH electrode, and the electrode charged to 2.5 V and full discharged to 0.005 V over the coin cell of sodium ion batteries. As shown in Figure 5S, the bands at 274, 445 and 660 cm<sup>-1</sup> are indexed to Na-O-Ti stretching. The band at 905 cm<sup>-1</sup> is indicated to symmetric stretch of short Ti-O bonds involving nonbridging oxygen coordinated with sodium ions. The a) curve is Raman spectra of initial NTOH , the curve b) represents the fully discharged NTOH and the curve c is Raman spectra of fully charged NTOH. There is no obvious position difference of Raman bands between curve a, b and c, only difference is lying in the intensity of the Raman band. The Raman intensity signal of b is much higher than that of a, indicating that more Na<sup>+</sup> inserted in to frame of NTOH, strengthening the Raman signal. However, when the fully Na-inserted NTOH experiences the charge process, the

Raman intensity is decreasing comparing with the initial NTOH, indicating that  $\text{Na}^+$  extracted during the process.

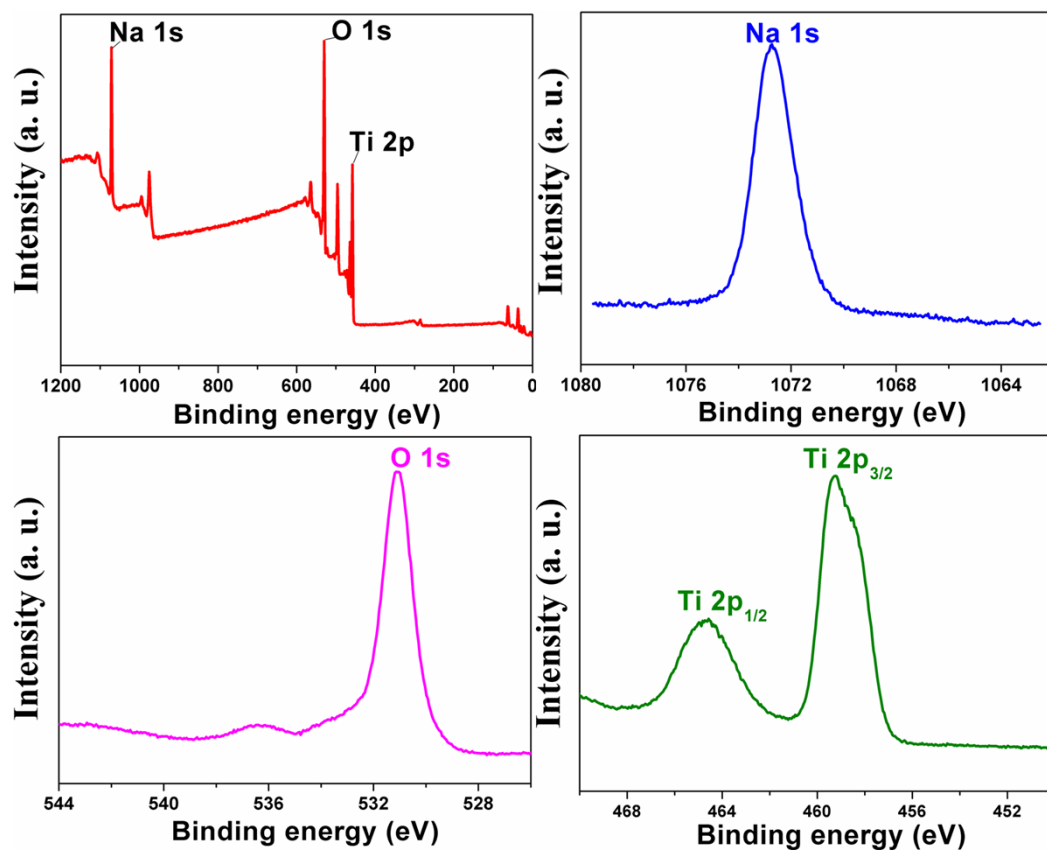

**Figure S6.** XPS spectra of as prepared  $\text{Na}_2\text{Ti}_2\text{O}_4(\text{OH})_2$  nanosheet.

**Table1S.** Impedance parameters calculated from equivalent circuits from fresh cell of NIB and LIB

| Ion-storage | Re ( $\Omega$ ) | Rct ( $\Omega$ ) | Zw ( $\Omega$ ) |
|-------------|-----------------|------------------|-----------------|
| SIBs        | 20              | 150              | 45              |
| LIBs        | 4               | 60               | 59              |

**Table S2.** Comparison of Na<sub>2</sub>Ti<sub>2</sub>O<sub>4</sub>(OH)<sub>2</sub> (this work) and various reported material for Li-ion batteries

| <b>Material</b>                                                  | <b>Reversible<br/>Capacity (mAh/g)</b> | <b>Rate</b>                            | <b>Ref.<br/>(manuscript)</b> |
|------------------------------------------------------------------|----------------------------------------|----------------------------------------|------------------------------|
| <b>Na<sub>2</sub>Ti<sub>2</sub>O<sub>4</sub>(OH)<sub>2</sub></b> | <b>120/500cycles/ SIBs</b>             | <b>10C</b>                             | <b>This work</b>             |
| <b>nanosheet</b>                                                 | <b>150/500cycles/LIBs</b>              | <b>1C</b>                              | <b>This work</b>             |
| <b>SnO<sub>2</sub></b>                                           | <b>420/100cycles/SIBs</b>              | <b>20 mA/g<br/>( current density)</b>  | <b>27</b>                    |
|                                                                  | <b>163/50cycles/LIBs</b>               | <b>100 mA/g<br/>( current density)</b> | <b>26</b>                    |
| <b>V<sub>2</sub>O<sub>5</sub></b>                                | <b>160/100cycles/LIBs</b>              | <b>300 mA/g<br/>( current density)</b> | <b>30</b>                    |
|                                                                  | <b>135/100cycle/SIBs</b>               | <b>320 mA/g<br/>( current density)</b> | <b>31</b>                    |
| <b>TiO<sub>2</sub></b>                                           | <b>125/200cycle/LIBs</b>               | <b>1/3 C rate</b>                      | <b>32</b>                    |
|                                                                  | <b>140/60cycle/SIBs</b>                | <b>50 mA/g<br/>( current density)</b>  | <b>33</b>                    |

## Reference

- [1] V. Augugliaro, S. Coluccia, V. Loddo, L. Marchese, G. Martra, L. Palmisano, M. Schiavello, *Applied Catalysis B: Environmental*, **1999**, 20, 15-27.
- [2] D. K. Lee, H.-W. Shim, J. S. An, C. M. Cho, I.-S. Cho, K. S. Hong, D.-W. Kim, *Nanoscale Res Lett*, **2010**, 5, 1585-1589.
- [3] T.-F. Yi, L. Jiang, J. Liu, M. Ye, H. Fang, A. Zhou, J. Shu, *Ionics*, **2011**, 17, 799-803.
- [4] T. Yi, Y. Xie, L. Jiang, J. Shu, C. Yue, A. Zhou, M. Ye, *RSC Advances*, **2012**, 2, 3541-3547.
